# Supplementary material
Source: PubMed Central journal article supplement (PMC5638662)
Supplement: NIHMS860248-supplement-supplement_1.pdf [file NIHMS860248-supplement-supplement_1.pdf]

# Supplemental Figures

1A

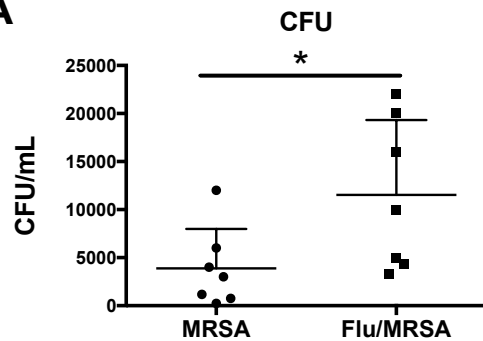

1B

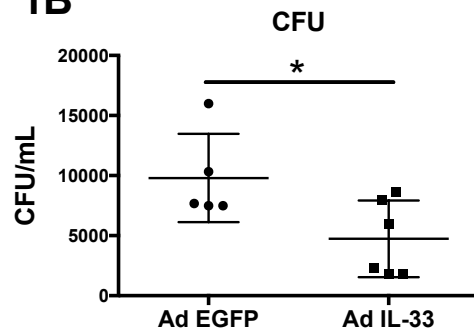

1C

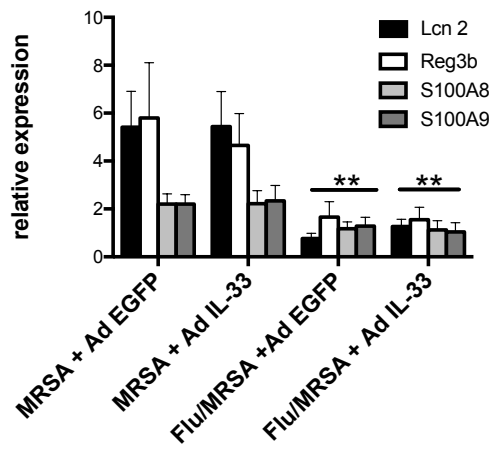

from combined experiments with the exception of panels A and B, these experiments were performed once.

#### Supplemental Figure 1

C57BL/6 WT mice were infected with influenza and MRSA. 1A - Bacterial colony counts in the lung (n=7). C57BL/6 mice were infected with 100 PFU of influenza A PR/8/34, on day 3 received adenovirus ( $2.5 \times 10^8$  pfu in 50  $\mu$ l sterile PBS IT) expressing IL-33 or enhanced (EGFP) (control), and on day 6 were challenged with  $5 \times 10^7$  CFU of MRSA for 24 hours. 1B - Bacterial colony counts in the lung (n=5-6). 1C - Gene expression in lung tissue of Type 17 immune-related antimicrobial peptides measured by RT-PCR (n=5-6). \*  $p < 0.05$  versus control group. Each experiment was independently performed twice and data are shown from combined experiments.
